# Supplementary material for: Metabolomic Profiles and Pathways in Osteoarthritic Human Cartilage: A Comparative Analysis with Healthy Cartilage
Source: MDPI journal article supplement (doi:10.3390/metabo14040183), 2024-03-25
Supplement: s1 [file s1]

| Highest In | m/z        | Progenesis m/z | Mass Error (ppm) |
|------------|------------|----------------|------------------|
| Healthy    | 119.060069 | 119.0595711    | -6.830267195     |
|            | 119.060069 | 119.0595711    | -6.806566327     |
|            |            |                |                  |
| Healthy    | 130.024509 | 130.0235934    | -8.711911535     |
|            |            |                |                  |
| Healthy    | 164.014983 | 164.0141201    | 0.458091397      |
|            |            |                |                  |
| Healthy    | 170.030653 | 170.0298536    | 9.432038673      |
|            |            |                |                  |
| Healthy    | 210.063548 | 210.0625986    | -6.328971744     |
|            |            |                |                  |
| Healthy    | 252.084856 | 252.0840623    | -6.623526452     |
|            |            |                |                  |
| Healthy    | 263.103186 | 263.1017605    | -3.330165563     |
|            |            |                |                  |
| Healthy    | 268.082227 | 268.0807126    | 0.872769285      |
|            |            |                |                  |
| Healthy    | 273.145904 | 273.146731     | 2.461545549      |
|            | 273.145904 | 273.146731     | 2.461545549      |
|            | 273.145904 | 273.146731     | 2.461545549      |
|            | 273.145904 | 273.146731     | 2.475793523      |
|            | 273.145904 | 273.146731     | 2.461545549      |
|            | 273.145904 | 273.146731     | 2.461545549      |
|            | 273.145904 | 273.146731     | 2.475793523      |
|            | 273.145904 | 273.146731     | 2.475793523      |
|            | 273.145904 | 273.146731     | 2.461545549      |
|            | 273.145904 | 273.146731     | 2.461545549      |
|            |            |                |                  |
| Healthy    | 280.117843 | 280.1174785    | -1.686104569     |
|            |            |                |                  |
| Healthy    | 299.101586 | 299.1003539    | 0.511285275      |
|            |            |                |                  |
| Healthy    | 305.13762  | 305.1368575    | 3.235847782      |
|            | 305.13762  | 305.1378272    | 6.672911318      |
|            |            |                |                  |
| Healthy    | 313.069919 | 313.0673012    | -3.311231931     |
|            | 313.069919 | 313.0673012    | -3.301463384     |
|            |            |                |                  |
| Healthy    | 317.188902 | 317.1885518    | 8.208634718      |
|            | 317.188902 | 317.1885518    | 8.208634718      |
|            |            |                |                  |
| Healthy    | 321.113237 | 321.1121698    | 8.184987438      |
|            | 321.113237 | 321.1121698    | 0.10754214       |
|            | 321.113237 | 321.1121698    | 8.184987438      |
|            |            |                |                  |

|         |            |             |              |
|---------|------------|-------------|--------------|
| Healthy | 327.23224  | 327.2321191 | 8.769987921  |
|         |            |             |              |
| Healthy | 341.248911 | 341.2483666 | 2.516244613  |
|         | 341.248911 | 341.2483666 | 2.516244613  |
|         |            |             |              |
| Healthy | 343.114548 | 343.1143175 | -2.784965477 |
|         | 343.114548 | 343.1143175 | -2.784965477 |
|         |            |             |              |
| Healthy | 347.165846 | 347.166375  | 3.860111469  |
|         |            |             |              |
| Healthy | 348.193673 | 348.1932211 | -7.443709246 |
|         | 348.193673 | 348.1932211 | -7.443709246 |
|         | 348.193673 | 348.1932211 | -7.443709246 |
|         |            |             |              |
| Healthy | 349.16684  | 349.1663159 | 5.030654473  |
|         |            |             |              |
| Healthy | 355.265651 | 355.2655095 | 6.614082099  |
|         |            |             |              |
| Healthy | 357.131336 | 357.1308988 | -6.64382805  |
|         | 357.131336 | 357.1308988 | -6.64382805  |
|         | 357.131336 | 357.1308988 | -6.64382805  |
|         | 357.131336 | 357.1308988 | -6.64382805  |
|         | 357.131336 | 357.1308988 | -6.64382805  |
|         | 357.131336 | 357.1308988 | -6.64382805  |
|         | 357.131336 | 357.1308988 | -6.64382805  |
|         | 357.131336 | 357.1308988 | -6.64382805  |
|         | 357.131336 | 357.1308988 | -6.64382805  |
|         | 357.131336 | 357.1308988 | 9.55702194   |
|         | 357.131336 | 357.1308988 | -7.304142567 |
|         |            |             |              |
| Healthy | 363.197939 | 363.1971633 | 1.534760866  |
|         |            |             |              |
| Healthy | 365.140092 | 365.1377348 | 5.232545476  |
|         |            |             |              |
| Healthy | 371.188703 | 371.1886024 | -0.186641035 |
|         | 371.188703 | 371.1886024 | -0.186641035 |
|         |            |             |              |
| Healthy | 379.137695 | 379.1385626 | 6.24507266   |
|         |            |             |              |
| Healthy | 379.231064 | 379.2311824 | 8.629853743  |
|         |            |             |              |
| Healthy | 385.278105 | 385.2773501 | 9.443153923  |
|         | 385.278105 | 385.2773501 | 9.443153923  |
|         |            |             |              |
| Healthy | 387.234302 | 387.2344285 | 3.738887609  |
|         | 387.234302 | 387.2344285 | -8.507733111 |
|         |            |             |              |

|         |            |             |              |
|---------|------------|-------------|--------------|
| Healthy | 389.177112 | 389.1755807 | 5.221511408  |
|         |            |             |              |
| Healthy | 399.295298 | 399.2951803 | -3.522801376 |
|         |            |             |              |
| Healthy | 413.254223 | 413.2537177 | 0.842359691  |
|         |            |             |              |
| Healthy | 425.203748 | 425.2033123 | -8.925369221 |
|         |            |             |              |
| Healthy | 430.232803 | 430.2330325 | 4.397132381  |
|         |            |             |              |
| Healthy | 437.183871 | 437.1834451 | -7.910609949 |
|         | 437.183871 | 437.1834451 | -0.269293361 |
|         |            |             |              |
| Healthy | 439.19096  | 439.1901962 | -8.786680875 |
|         | 439.19096  | 439.1901962 | 3.05762053   |
|         |            |             |              |
|         | 459.3214   | 459.3208708 | -5.684942744 |
|         | 459.3214   | 459.3208708 | -5.684942744 |
|         |            |             |              |
| Healthy | 479.195704 | 479.1995112 | -9.912995468 |
|         | 479.195704 | 479.1995112 | 0.010022384  |
|         |            |             |              |
| Healthy | 482.258846 | 482.2553504 | -3.605288388 |
|         |            |             |              |
| Healthy | 489.336073 | 489.3349943 | -2.71827169  |
|         |            |             |              |
| Healthy | 501.300337 | 501.3034363 | -4.743447495 |
|         | 501.367472 | 501.3683499 | -4.079609747 |
|         | 501.367472 | 501.3673663 | 2.273297588  |
|         |            |             |              |
| Healthy | 504.266603 | 504.2659741 | 4.100328154  |
|         |            |             |              |
| Healthy | 507.290213 | 507.2898201 | 2.173155019  |
|         | 507.324196 | 507.3244679 | 2.305344108  |
|         |            |             |              |
| Healthy | 510.341826 | 510.341302  | -2.435369387 |
|         |            |             |              |
| Healthy | 531.31211  | 531.3122366 | -7.802110291 |
|         |            |             |              |
| Healthy | 540.289482 | 540.291902  | 8.071034309  |
|         |            |             |              |
| Healthy | 545.396299 | 545.396629  | 0.215732749  |
|         |            |             |              |
| Healthy | 565.371599 | 565.3708039 | 6.817390546  |
|         |            |             |              |
| Healthy | 569.247956 | 569.252058  | -8.767634864 |

|         |            |             |              |
|---------|------------|-------------|--------------|
|         | 569.247956 | 569.252058  | 1.983940819  |
|         |            |             |              |
| Healthy | 573.403851 | 573.4045509 | -3.905738475 |
|         | 573.403851 | 573.4045509 | -3.880941648 |
|         |            |             |              |
| Healthy | 579.278966 | 579.2782817 | -1.100059738 |
|         |            |             |              |
| Healthy | 579.388397 | 579.3876181 | -2.689037335 |
|         | 579.388397 | 579.3876181 | -2.689037335 |
|         |            |             |              |
| Healthy | 585.377152 | 585.3748861 | -2.29144377  |
|         |            |             |              |
| Healthy | 586.309961 | 586.3105491 | -2.939211218 |
|         |            |             |              |
| Healthy | 589.425081 | 589.4257097 | 0.973775854  |
|         |            |             |              |
| Healthy | 591.410497 | 591.4121109 | -9.059758857 |
|         |            |             |              |
| Healthy | 593.368842 | 593.3686187 | 0.352843685  |
|         | 593.410783 | 593.4057744 | 1.652903305  |
|         |            |             |              |
| Healthy | 605.427726 | 605.428854  | -6.922000935 |
|         | 605.427726 | 605.428854  | -6.922000935 |
|         | 605.427726 | 605.428854  | -6.922000935 |
|         | 605.427726 | 605.4275945 | 6.949896727  |
|         | 605.427726 | 605.428854  | 4.860161835  |
|         |            |             |              |
| Healthy | 611.314133 | 611.3184349 | -0.597294864 |
|         |            |             |              |
| Healthy | 617.334264 | 617.3318838 | 3.819567529  |
|         |            |             |              |
| Healthy | 621.430302 | 621.4256961 | -3.543081467 |
|         |            |             |              |
| Healthy | 625.327497 | 625.327167  | -0.074668329 |
|         |            |             |              |
| Healthy | 635.41557  | 635.414837  | -0.824194362 |
|         | 635.440265 | 635.4424264 | 0.914133286  |
|         |            |             |              |
| Healthy | 675.43831  | 675.4377729 | -9.933806486 |
|         |            |             |              |
| Healthy | 694.471255 | 694.4658626 | -2.692605862 |
|         |            |             |              |
|         |            |             |              |
| Healthy | 707.503465 | 707.5073679 | -6.123721697 |
|         |            |             |              |
| Healthy | 709.486551 | 709.4879768 | 2.70599108   |

|                |            |             |              |
|----------------|------------|-------------|--------------|
|                | 709.486551 | 709.4879768 | 2.70599108   |
|                |            |             |              |
| Healthy        | 721.408248 | 721.4068243 | -9.340737448 |
|                | 721.408248 | 721.4068243 | -9.340737448 |
|                | 721.408248 | 721.4068243 | -9.340737448 |
|                |            |             |              |
| Healthy        | 723.50207  | 723.5063555 | 6.547128916  |
|                | 723.50207  | 723.5063555 | 6.547128916  |
|                |            |             |              |
| Healthy        | 737.422857 | 737.4231864 | -0.061114298 |
|                |            |             |              |
| Healthy        | 749.427998 | 749.4289584 | 7.65210413   |
|                | 749.54639  | 749.5473193 | -0.849696537 |
|                |            |             |              |
| Healthy        | 765.440198 | 765.4410386 | -1.216569041 |
|                | 765.440198 | 765.4410386 | 1.987608054  |
|                |            |             |              |
| Healthy        | 771.508782 | 771.5100644 | -6.156492176 |
|                |            |             |              |
| Healthy        | 809.471669 | 809.472784  | 5.690654565  |
|                | 809.471669 | 809.472784  | 8.908542218  |
|                | 809.471669 | 809.472784  | 8.908542217  |
|                |            |             |              |
| Healthy        | 869.517032 | 869.5188128 | -7.927762579 |
|                |            |             |              |
| Healthy        | 958.578934 | 958.5880737 | -0.583806249 |
|                |            |             |              |
| Osteoarthritis | 178.033845 | 178.0327355 | 3.525957082  |
|                |            |             |              |
| Osteoarthritis | 220.043408 | 220.0441048 | -8.448698136 |
|                |            |             |              |
|                |            |             |              |
| Osteoarthritis | 369.122538 | 369.1291446 | -0.264634679 |
|                |            |             |              |
| Osteoarthritis | 405.197126 | 405.1947228 | -8.059643142 |
|                |            |             |              |
| Osteoarthritis | 464.305935 | 464.3060359 | -3.968404957 |
|                |            |             |              |
| Osteoarthritis | 466.321431 | 466.3122466 | -8.74246491  |
|                | 466.321431 | 466.3122466 | -8.74246491  |
|                | 466.321431 | 466.3122466 | -8.74246491  |
|                |            |             |              |
| Osteoarthritis | 487.29224  | 487.2844717 | 5.571900724  |
|                |            |             |              |
| Osteoarthritis | 494.312139 | 494.3205418 | -7.505881935 |
|                |            |             |              |
| Osteoarthritis | 552.07514  | 552.0735244 | -3.66525424  |

|                |            |             |              |
|----------------|------------|-------------|--------------|
|                |            |             |              |
| Osteoarthritis | 790.49629  | 790.49399   | -0.903641817 |
|                |            |             |              |
| Osteoarthritis | 829.469017 | 829.4554053 | -3.147129513 |
|                |            |             |              |
| Osteoarthritis | 1071.67518 | 1071.668515 | 6.597887384  |

| Compound ID                        | Description                                      |
|------------------------------------|--------------------------------------------------|
| CSID5593                           | Benzimidazole                                    |
| HMDB40040                          | 5H-Cyclopentapyrazine                            |
|                                    |                                                  |
| HMDB41861, HMDB0041861_c_ms_102279 | cyanuric acid                                    |
|                                    |                                                  |
| HMDB37168                          | 2-Propanoylthiazole                              |
|                                    |                                                  |
| CSID6025                           | Methylnitronitrosoguanidine                      |
|                                    |                                                  |
| HMDB15496,CSID3570                 | Amrinone                                         |
|                                    |                                                  |
| CSID20129465                       | N-Hydroxy-melQX                                  |
|                                    |                                                  |
| HMDB31360                          | L-cis-Cyclo(aspartylphenylalanyl)                |
|                                    |                                                  |
| CSID4450275                        | (4Z)-4-(2-Amino-5-oxo-1,5-dihydro-4H-imidazo     |
|                                    |                                                  |
| HMDB35798, CSID143579              | Piperdial                                        |
| HMDB31901                          | Blennin A                                        |
| HMDB37529                          | Lactaronecatorin A                               |
| CSID65413                          | Warburganal                                      |
| HMDB39644                          | Heliannuol A                                     |
| HMDB35137                          | Heliannuol D                                     |
| CSID30790779                       | (1R,3aR,5aS,6R)-6-Hydroxy-1,7,7-trimethyl-1,2,3  |
| CSID30790781                       | (1S,2R,3aR,5aS)-2-Hydroxy-1,7,7-trimethyl-1,2,3  |
| HMDB30917                          | 1-Hydroxyacorenone                               |
| HMDB35148                          | (6beta,8alpha)-6-Hydroxy-7(11)-eremophilen-1     |
|                                    |                                                  |
| HMDB32807                          | Niazirin                                         |
|                                    |                                                  |
| CSID38263                          | Oxagrelate                                       |
|                                    |                                                  |
| HMDB33375                          | Octyl gallate                                    |
| HMDB38989                          | Oxyhumulinic acid                                |
|                                    |                                                  |
| CSID389080                         | (+)-leucopelargonidin                            |
| HMDB32322                          | cis-3 and trans-2-Hexenyl propionate             |
|                                    |                                                  |
| CSID26433                          | amquinatate                                      |
| CSID54820                          | 5-{3-[(2S)-Bicyclo[2.2.1]hept-2-yl]oxy}-4-methox |
|                                    |                                                  |
| HMDB29543                          | (+)-Ligballinol                                  |
| HMDB41463                          | 2,3-Dihydro-2,3-dihydroxy-4-(4-methoxyphenyl     |
| HMDB04808                          | 7C-aglycone                                      |
|                                    |                                                  |

|                       |                                                              |
|-----------------------|--------------------------------------------------------------|
| HMDB01043, CSID392692 | Arachidonic acid                                             |
|                       |                                                              |
| CSID6357              | dimethisterone                                               |
| CSID140149            | 17-ethynylandrost-2-ene-17-ol-17-acetate                     |
|                       |                                                              |
| HMDB15159             | Mycophenolic acid                                            |
| HMDB37321             | Oleacein                                                     |
|                       |                                                              |
| CSID8134              | Piperonyl sulfoxide                                          |
|                       |                                                              |
| HMDB38837             | (R)-Mahanine                                                 |
| HMDB38827             | Murrayazolinol                                               |
| HMDB38828             | Pyrafoline D                                                 |
|                       |                                                              |
| CSID4444835           | Tagitinin F                                                  |
|                       |                                                              |
| CSID30791731          | Bufa-20,22-dienolide                                         |
|                       |                                                              |
| HMDB41290             | 1,8-Dihydroxy-3,5-dimethoxy-2-prenylxanthone                 |
| HMDB29459             | Xanthoxylol                                                  |
| HMDB30682             | Cubebin                                                      |
| HMDB38774             | 5-Deoxykievitols                                             |
| HMDB33027             | Licoagrodione                                                |
| HMDB35525             | Licofuranone                                                 |
| HMDB34213             | Kievitone                                                    |
| HMDB41123             | Kinobeaon A                                                  |
| HMDB12996             | Lipoyllysine                                                 |
| HMDB41826             | amifloxacin                                                  |
|                       |                                                              |
| CSID210391            | 17,21-Epoxy-9-fluoro-11beta-hydroxyprogesterone              |
|                       |                                                              |
| HMDB31535             | Hydroxygaleon                                                |
|                       |                                                              |
| HMDB02759             | Androsterone sulfate                                         |
| HMDB13232             | Etiocholanolone sulfate                                      |
|                       |                                                              |
| HMDB31695             | xi-3-Hydroxy-5-phenylpentanoic acid O-beta-D-glucopyranoside |
|                       |                                                              |
| CSID10128451          | 21-fluoro-11?,17-dihydroxy-6?-methylprogesterone             |
|                       |                                                              |
| HMDB34952             | Persicaxanthin                                               |
| HMDB36425             | Persicachrome                                                |
|                       |                                                              |
| CSID4940685           | dalvastatin                                                  |
| CSID20016206          | oleandolide                                                  |
|                       |                                                              |



|              |                                                    |
|--------------|----------------------------------------------------|
| CSID29271896 | Liafensine                                         |
|              |                                                    |
| CSID2981     | Dimorpholamine                                     |
|              |                                                    |
| CSID390585   | (14R)-3beta,5,6beta,10,16-pentahydroxygrayar       |
|              |                                                    |
| HMDB14682    | Benazepril                                         |
|              |                                                    |
| HMDB13024    | Neurotensin 11-13                                  |
|              |                                                    |
| HMDB15013    | Flupenthixol                                       |
| CSID4593753  | naltrindole                                        |
|              |                                                    |
| HMDB36340    | Ethyl 7-epi-12-hydroxyjasmonate glucoside          |
| CSID9399462  | Radezolid                                          |
|              |                                                    |
| HMDB35983    | Ganoderal A                                        |
| HMDB30395    | Manglupenone                                       |
|              |                                                    |
| CSID23332653 | kurarinol                                          |
| CSID64481    | Clobetasone butyrate                               |
|              |                                                    |
| HMDB05084    | N-Acetyl-leukotriene E4                            |
|              |                                                    |
| HMDB36884    | 7',8'-Dihydro-8'-hydroxycitraniaxanthin            |
|              |                                                    |
| HMDB14554    | Mupirocin                                          |
| HMDB34578    | Deterrol stearate                                  |
| HMDB30272    | Carpaine                                           |
|              |                                                    |
| CSID447456   | ANTIBIOTIC JI-20A                                  |
|              |                                                    |
| HMDB15593    | Ixabepilone                                        |
| HMDB39015    | Tangeraxanthin                                     |
|              |                                                    |
| CSID4445266  | narbomycin                                         |
|              |                                                    |
| HMDB40844    | (S)-Nerolidol 3-O-[alpha-L-rhamnopyranosyl-(1->2)- |
|              |                                                    |
| CSID2339128  | Apramycin                                          |
|              |                                                    |
| HMDB41205    | Panaxydol linoleate                                |
|              |                                                    |
| CSID391760   | (1S,2R,3S,4S,6R,7R,8R,14S)-3-Hydroxy-2,4,7,14-     |
|              |                                                    |
| HMDB36317    | Canavalioside                                      |

|                |                                                 |
|----------------|-------------------------------------------------|
| HMDB34352      | Morellinol                                      |
|                |                                                 |
| CSID4444648    | Echinenone                                      |
| HMDB02890      | 3-cis-Hydroxy-b,e-Caroten-3'-one                |
|                |                                                 |
| CSID20131003   | Omadacycline                                    |
|                |                                                 |
| CSID30791712   | Timosaponin A-I                                 |
| CSID389388     | (25S)-5beta-spirostan-3beta-yl beta-D-glucoside |
|                |                                                 |
| HMDB10330      | Cholesterol glucuronide                         |
|                |                                                 |
| CSID21106220   | Tanespimycin                                    |
|                |                                                 |
| HMDB40807      | Caffeoylcycloartenol                            |
|                |                                                 |
| CSID4444655    | Lutein                                          |
|                |                                                 |
| HMDB34391      | Agavoside A                                     |
| HMDB39054      | Tuberoside                                      |
|                |                                                 |
| CSID4518328    | Hydroxyspirilloxanthin                          |
| CSID4518272    | Spheroidenone                                   |
| CSID30791959   | Thiothece-474                                   |
| CSID570993     | Polidocanol                                     |
| CSID4445232    | 3,6-Anhydro-2,4,5-tris-O-(2-hydroxyethyl)-1-O-  |
|                |                                                 |
| CSID391535     | BQ-123                                          |
|                |                                                 |
| CSID10473090   | 13-deoxytedanolide                              |
|                |                                                 |
| HMDB30100      | (8'R)-Neochrome                                 |
|                |                                                 |
| HMDB34104      | Neferine                                        |
|                |                                                 |
| HMDB35917      | Momordicoside L                                 |
| CSID148923     | Eldacimibe                                      |
|                |                                                 |
| HMDB38016      | Ginsenoside Rh5                                 |
|                |                                                 |
| HMDB30492      | Spirolide B                                     |
|                |                                                 |
|                |                                                 |
| CSID8093615    | trodusquemine                                   |
|                |                                                 |
| MGDG(26:1/3:0) | MGDG(26:1/3:0)                                  |

|                |                                                  |
|----------------|--------------------------------------------------|
| MGDG(3:0/26:1) | MGDG(3:0/26:1)                                   |
|                |                                                  |
| HMDB35944      | Cyclopassifloside I                              |
| HMDB35946      | Cyclopassifloside IV                             |
| HMDB36365      | Cyclopassifloside X                              |
|                |                                                  |
| MGDG(26:1/4:0) | MGDG(26:1/4:0)                                   |
| MGDG(4:0/26:1) | MGDG(4:0/26:1)                                   |
|                |                                                  |
| CSID30792054   | Myxochromide S2                                  |
|                |                                                  |
| CSID30792053   | Myxochromide S3                                  |
| CSID4446659    | Ubiquinone-10                                    |
|                |                                                  |
| HMDB15468      | Digitoxin                                        |
| HMDB38345      | Alliosterol 1-rhamnoside 16-galactoside          |
|                |                                                  |
| CSID4445464    | 1-PALMITOYL-2-OLEOYL-SN-GLYCERO-3-(PHOSPHATE)    |
|                |                                                  |
| HMDB41018      | Calenduloside G methyl ester                     |
| HMDB40781      | Vinaginsenoside R11                              |
| HMDB40418      | Majonoside R2                                    |
|                |                                                  |
| HMDB41351      | Koryoginsenoside R1                              |
|                |                                                  |
| HMDB15529      | Everolimus                                       |
|                |                                                  |
| HMDB38591      | Brassicinal A                                    |
|                |                                                  |
| CSID389199     | Guanidinoethyl methyl phosphate                  |
|                |                                                  |
|                |                                                  |
| HMDB01204      | trans-3-Hydroxycotinine glucuronide              |
|                |                                                  |
| CSID108701     | Tetraxetan                                       |
|                |                                                  |
| CSID388706     | Gentamycin C2                                    |
|                |                                                  |
| HMDB00138      | Glycocholic acid                                 |
| HMDB00331      | 3a,7b,12a-Trihydroxyoxocholanyl-Glycine          |
| HMDB32596      | Sodium glycocholate                              |
|                |                                                  |
| CSID140269     | Pristimerin                                      |
|                |                                                  |
| HMDB06510      | Cervonyl carnitine                               |
|                |                                                  |
| CSID30791094   | dTDP-3-amino-2,3,6-trideoxy-D-threo-hexopyranose |

|              |                                                  |
|--------------|--------------------------------------------------|
|              |                                                  |
| CSID64402    | ERYTHROMYCIN PROPIONATE                          |
|              |                                                  |
| HMDB35449    | 1beta,2alpha,3beta,19alpha-Tetrahydroxy-12-u     |
|              |                                                  |
| CSID28285403 | (3S)-3-{(2S,3R,5S)-5-[(2R)-3-{(2S,4aS,5aR,6R,6aS |

| Accepted?      | Adducts   | Formula    | Score (out of 100) | Score (out of 60) | Fragmentation Score |
|----------------|-----------|------------|--------------------|-------------------|---------------------|
|                | M+H       | C7H6N2     | 72.66666667        | 43.6              | 27.8                |
|                | M+H       | C7H6N2     | 73.66666667        | 44.2              | 30.7                |
|                |           |            |                    |                   |                     |
|                | M+H       | C3H3N3O3   | 71.5               | 42.9              | 28.9                |
|                |           |            |                    |                   |                     |
| *              | M+Na      | C6H7NOS    | 70.33333333        | 42.2              | 23.4                |
|                |           |            |                    |                   |                     |
| *              | M+Na      | C2H5N5O3   | 67.16666667        | 40.3              | 15.2                |
|                |           |            |                    |                   |                     |
|                | M+Na      | C10H9N3O   | 69.16666667        | 41.5              | 19                  |
|                |           |            |                    |                   |                     |
| *              | M+Na      | C11H11N5O  | 71.5               | 42.9              | 35.2                |
|                |           |            |                    |                   |                     |
| *              | M+H, M+Na | C13H14N2O4 | 70.5               | 42.3              | 19.9                |
|                |           |            |                    |                   |                     |
| *              | M+Na      | C11H11N5O2 | 67.16666667        | 40.3              | 15.5                |
|                |           |            |                    |                   |                     |
|                | M+Na      | C15H22O3   | 71.66666667        | 43                | 22.8                |
|                | M+Na      | C15H22O3   | 71.66666667        | 43                | 22.8                |
|                | M+Na      | C15H22O3   | 71.83333333        | 43.1              | 23.4                |
|                | M+Na      | C15H22O3   | 71.83333333        | 43.1              | 23.4                |
|                | M+Na      | C15H22O3   | 72                 | 43.2              | 23.8                |
|                | M+Na      | C15H22O3   | 72                 | 43.2              | 23.8                |
| 3,3a,5a,6,7,8- | M+Na      | C15H22O3   | 72                 | 43.2              | 23.8                |
| 3,3a,5a,6,7,8- | M+Na      | C15H22O3   | 72                 | 43.2              | 24.1                |
|                | M+Na      | C15H22O3   | 72.33333333        | 43.4              | 25.1                |
| 2,8-olide      | M+Na      | C15H22O3   | 72.5               | 43.5              | 25.3                |
|                |           |            |                    |                   |                     |
| *              | M+H       | C14H17NO5  | 73                 | 43.8              | 23.6                |
|                |           |            |                    |                   |                     |
| *              | M+Na      | C14H16N2O4 | 70.33333333        | 42.2              | 17.5                |
|                |           |            |                    |                   |                     |
| *              | M+Na      | C15H22O5   | 67                 | 40.2              | 15                  |
| *              | M+Na      | C15H22O5   | 67.33333333        | 40.4              | 25.6                |
|                |           |            |                    |                   |                     |
|                | M+Na      | C15H14O6   | 69.5               | 41.7              | 15.9                |
|                | M+Na      | C15H14O6   | 69.5               | 41.7              | 15.9                |
|                |           |            |                    |                   |                     |
|                | M+H       | C18H24N2O3 | 67.5               | 40.5              | 16.6                |
| yphenyl}tetra  | M+H       | C18H24N2O3 | 67.5               | 40.5              | 16.6                |
|                |           |            |                    |                   |                     |
|                | M+Na      | C18H18O4   | 68.33333333        | 41                | 23.3                |
| )-1H-phenale   | M+H       | C20H16O4   | 68.66666667        | 41.2              | 17                  |
|                | M+Na      | C18H18O4   | 69.16666667        | 41.5              | 25.4                |
|                |           |            |                    |                   |                     |

|              |           |            |             |      |      |
|--------------|-----------|------------|-------------|------|------|
|              | M+Na      | C20H32O2   | 66.83333333 | 40.1 | 13   |
|              |           |            |             |      |      |
|              | M+H       | C23H32O2   | 70          | 42   | 16.5 |
|              | M+H       | C23H32O2   | 70.16666667 | 42.1 | 16.9 |
|              |           |            |             |      |      |
|              | M+Na      | C17H20O6   | 68.16666667 | 40.9 | 14.7 |
|              | M+Na      | C17H20O6   | 69.5        | 41.7 | 18.8 |
|              |           |            |             |      |      |
| *            | M+H, M+Na | C18H28O3S  | 69.33333333 | 41.6 | 16.4 |
|              |           |            |             |      |      |
|              | M+H       | C23H25NO2  | 67.33333333 | 40.4 | 13.2 |
|              | M+H       | C23H25NO2  | 67.5        | 40.5 | 13.8 |
|              | M+H       | C23H25NO2  | 67.5        | 40.5 | 13.8 |
|              |           |            |             |      |      |
| *            | M+H       | C19H24O6   | 67.16666667 | 40.3 | 27.4 |
|              |           |            |             |      |      |
| *            | M+H       | C24H34O2   | 70.66666667 | 42.4 | 24.5 |
|              |           |            |             |      |      |
| 2            | M+H       | C20H20O6   | 67.5        | 40.5 | 16.5 |
|              | M+H       | C20H20O6   | 67.83333333 | 40.7 | 17.5 |
|              | M+H       | C20H20O6   | 68          | 40.8 | 18.1 |
|              | M+H       | C20H20O6   | 68.16666667 | 40.9 | 18.6 |
|              | M+H       | C20H20O6   | 68.33333333 | 41   | 19   |
|              | M+H       | C20H20O6   | 68.5        | 41.1 | 19.2 |
|              | M+H       | C20H20O6   | 68.83333333 | 41.3 | 20.6 |
|              | M+H       | C20H20O6   | 69.33333333 | 41.6 | 21.9 |
|              | M+Na      | C14H26N2O3 | 73.16666667 | 43.9 | 33.8 |
|              | M+Na      | C16H19FN4O | 75.33333333 | 45.2 | 40.8 |
|              |           |            |             |      |      |
| *            | M+H       | C21H27FO4  | 71.33333333 | 42.8 | 26.3 |
|              |           |            |             |      |      |
| *            | M+Na      | C20H22O5   | 67          | 40.2 | 12.8 |
|              |           |            |             |      |      |
|              | M+H, M+Na | C19H30O5S  | 72          | 43.2 | 19.6 |
|              | M+H, M+Na | C19H30O5S  | 72          | 43.2 | 19.6 |
|              |           |            |             |      |      |
| Glucopyranos | M+Na      | C17H24O8   | 67.83333333 | 40.7 | 17.7 |
|              |           |            |             |      |      |
| *            | M+H       | C22H31FO4  | 68.5        | 41.1 | 24.7 |
|              |           |            |             |      |      |
|              | M+H       | C25H36O3   | 67.66666667 | 40.6 | 17.5 |
|              | M+H       | C25H36O3   | 67.66666667 | 40.6 | 17.5 |
|              |           |            |             |      |      |
|              | M+H       | C24H31FO3  | 69          | 41.4 | 18.7 |
|              | M+H       | C20H34O7   | 70.83333333 | 42.5 | 25.8 |
|              |           |            |             |      |      |

|   |           |             |             |      |      |
|---|-----------|-------------|-------------|------|------|
| * | M+Na      | C24H22N4    | 68          | 40.8 | 25.2 |
|   |           |             |             |      |      |
| * | M+H       | C20H38N4O4  | 70          | 42   | 17.8 |
|   |           |             |             |      |      |
| * | M+H       | C22H36O7    | 76.33333333 | 45.8 | 40.4 |
|   |           |             |             |      |      |
|   | M+H       | C24H28N2O5  | 73.33333333 | 44   | 32.8 |
|   |           |             |             |      |      |
| * | M+Na      | C21H33N3O5  | 67.66666667 | 40.6 | 22.1 |
|   |           |             |             |      |      |
|   | M+H       | C23H27F3N2  | 71          | 42.6 | 29.9 |
|   | M+Na      | C26H26N2O3  | 75.66666667 | 45.4 | 32.2 |
|   |           |             |             |      |      |
|   | M+Na      | C20H32O9    | 67.33333333 | 40.4 | 20.2 |
|   | M+H       | C22H23FN6C  | 72          | 43.2 | 30.2 |
|   |           |             |             |      |      |
|   | M+Na      | C30H44O2    | 72.33333333 | 43.4 | 28.4 |
|   | M+Na      | C30H44O2    | 74.16666667 | 44.5 | 34.2 |
|   |           |             |             |      |      |
|   | M+Na      | C26H32O7    | 72          | 43.2 | 39.2 |
|   | M+H       | C26H32ClFO5 | 78.16666667 | 46.9 | 51.8 |
|   |           |             |             |      |      |
|   | M+H       | C25H39NO6S  | 77.83333333 | 46.7 | 49.9 |
|   |           |             |             |      |      |
| * | M+H       | C33H44O3    | 68.33333333 | 41   | 19.2 |
|   |           |             |             |      |      |
|   | M+H       | C26H44O9    | 71.83333333 | 43.1 | 31.5 |
|   | M+Na      | C33H50O2    | 67.66666667 | 40.6 | 16.8 |
|   | M+Na      | C28H50N2O4  | 69          | 41.4 | 19.9 |
|   |           |             |             |      |      |
| * | M+Na      | C19H39N5O9  | 68          | 40.8 | 18.2 |
|   |           |             |             |      |      |
|   | M+H, M+Na | C27H42N2O5  | 71          | 42.6 | 21.4 |
| * | M+Na      | C34H44O2    | 69.16666667 | 41.5 | 20.7 |
|   |           |             |             |      |      |
| * | M+H       | C28H47NO7   | 67          | 40.2 | 25.3 |
|   |           |             |             |      |      |
| * | M+H       | C27H46O10   | 67          | 40.2 | 12.3 |
|   |           |             |             |      |      |
| * | M+H       | C21H41N5O1  | 68.66666667 | 41.2 | 33.2 |
|   |           |             |             |      |      |
| * | M+Na      | C35H54O3    | 69.33333333 | 41.6 | 20   |
|   |           |             |             |      |      |
| * | M+H       | C31H52N2O5  | 70.5        | 42.3 | 29.2 |
|   |           |             |             |      |      |
|   | M+Na      | C26H42O12   | 67.33333333 | 40.4 | 22.5 |

|                |           |            |             |      |      |
|----------------|-----------|------------|-------------|------|------|
|                | M+Na      | C33H38O7   | 71.33333333 | 42.8 | 24   |
|                |           |            |             |      |      |
|                | M+Na      | C40H54O    | 71          | 42.6 | 25   |
|                | M+Na      | C40H54O    | 71.66666667 | 43   | 26.8 |
|                |           |            |             |      |      |
| *              | M+H, M+Na | C29H40N4O7 | 68.66666667 | 41.2 | 17.9 |
|                |           |            |             |      |      |
|                | M+H       | C33H54O8   | 69          | 41.4 | 20.4 |
| e              | M+H       | C33H54O8   | 69          | 41.4 | 20.4 |
|                |           |            |             |      |      |
| *              | M+Na      | C33H54O7   | 67.66666667 | 40.6 | 12.4 |
|                |           |            |             |      |      |
| *              | M+H       | C31H43N3O8 | 69.16666667 | 41.5 | 17   |
|                |           |            |             |      |      |
| *              | M+H, M+Na | C39H56O4   | 77          | 46.2 | 41.8 |
|                |           |            |             |      |      |
|                | M+Na      | C40H56O2   | 79          | 47.4 | 58.4 |
|                |           |            |             |      |      |
|                | M+H       | C33H52O9   | 71.66666667 | 43   | 32.4 |
| *              | M+H       | C34H56O8   | 70.5        | 42.3 | 22.3 |
|                |           |            |             |      |      |
|                | M+Na      | C41H58O2   | 70.16666667 | 42.1 | 26.8 |
|                | M+Na      | C41H58O2   | 71          | 42.6 | 29.4 |
|                | M+Na      | C41H58O2   | 72.33333333 | 43.4 | 33.3 |
|                | M+Na      | C30H62O10  | 74          | 44.4 | 37.4 |
| {2-[(9E)-9-oct | M+H       | C32H60O10  | 75.33333333 | 45.2 | 37   |
|                |           |            |             |      |      |
| *              | M+H, M+Na | C31H42N6O7 | 70.16666667 | 42.1 | 24.1 |
|                |           |            |             |      |      |
| *              | M+Na      | C32H50O10  | 67          | 40.2 | 29.5 |
|                |           |            |             |      |      |
| *              | M+Na      | C41H58O3   | 74.5        | 44.7 | 38.4 |
|                |           |            |             |      |      |
|                | M+H, M+Na | C38H44N2O6 | 71          | 42.6 | 18.3 |
|                |           |            |             |      |      |
|                | M+H, M+Na | C36H58O9   | 68.16666667 | 40.9 | 15.8 |
| *              | M+H       | C39H58N2O5 | 76.16666667 | 45.7 | 41.9 |
|                |           |            |             |      |      |
| *              | M+Na      | C37H64O9   | 68.16666667 | 40.9 | 27   |
|                |           |            |             |      |      |
| *              | M+H       | C42H63NO7  | 69.16666667 | 41.5 | 30.4 |
|                |           |            |             |      |      |
|                |           |            |             |      |      |
| *              | M+Na      | C37H72N4O5 | 67.83333333 | 40.7 | 29.6 |
|                |           |            |             |      |      |
|                | M+Na      | C38H70O10  | 68.66666667 | 41.2 | 26.4 |



|              |           |            |             |      |      |
|--------------|-----------|------------|-------------|------|------|
|              | M+Na      | C38H70O10  | 68.66666667 | 41.2 | 26.4 |
|              |           |            |             |      |      |
|              | M+Na      | C37H62O12  | 72          | 43.2 | 37.7 |
|              | M+Na      | C37H62O12  | 72          | 43.2 | 37.7 |
|              | M+Na      | C37H62O12  | 73.83333333 | 44.3 | 43.2 |
|              |           |            |             |      |      |
|              | M+Na      | C39H72O10  | 69.16666667 | 41.5 | 26.2 |
|              | M+Na      | C39H72O10  | 69.16666667 | 41.5 | 26.2 |
|              |           |            |             |      |      |
| *            | M+H       | C39H56N6O8 | 69.66666667 | 41.8 | 12.7 |
|              |           |            |             |      |      |
| *            | M+H       | C40H56N6O8 | 68.5        | 41.1 | 23.9 |
| *            | M+Na      | C49H74O4   | 68.33333333 | 41   | 17.1 |
|              |           |            |             |      |      |
|              | M+H       | C41H64O13  | 68.83333333 | 41.3 | 15.4 |
|              | M+Na      | C39H66O13  | 74.33333333 | 44.6 | 33.3 |
|              |           |            |             |      |      |
| *            | M+Na      | C40H77O10P | 70.66666667 | 42.4 | 20.6 |
|              |           |            |             |      |      |
|              | M+H       | C43H68O14  | 68.33333333 | 41   | 15.4 |
|              | M+Na      | C41H70O14  | 72.5        | 43.5 | 30.4 |
|              | M+Na      | C41H70O14  | 73.16666667 | 43.9 | 32   |
|              |           |            |             |      |      |
| *            | M+H       | C46H76O15  | 70          | 42   | 30.9 |
|              |           |            |             |      |      |
|              | M+H       | C53H83NO14 | 69.16666667 | 41.5 | 27.8 |
|              |           |            |             |      |      |
|              | M+H       | C9H7NOS    | 63.66666667 | 38.2 | 15.6 |
|              |           |            |             |      |      |
|              | M+Na      | C4H12N3O4P | 70.33333333 | 42.2 | 26.5 |
|              |           |            |             |      |      |
|              |           |            |             |      |      |
| *            | M+H       | C16H20N2O8 | 67.16666667 | 40.3 | 14.5 |
|              |           |            |             |      |      |
|              | M+H       | C16H28N4O8 | 66.66666667 | 40   | 18.6 |
|              |           |            |             |      |      |
|              | M+H, M+Na | C20H41N5O7 | 66.83333333 | 40.1 | 14.3 |
|              |           |            |             |      |      |
|              | M+H       | C26H43NO6  | 65.16666667 | 39.1 | 15.5 |
|              | M+H       | C26H43NO6  | 65.16666667 | 39.1 | 15.5 |
|              | M+H       | C26H43NO6  | 65.16666667 | 39.1 | 15.5 |
|              |           |            |             |      |      |
|              | M+Na      | C30H40O4   | 66.5        | 39.9 | 14   |
|              |           |            |             |      |      |
|              | M+Na      | C29H45NO4  | 66.16666667 | 39.7 | 14.7 |
|              |           |            |             |      |      |
| inos-4-ulose | M+Na      | C16H25N3O1 | 64.33333333 | 38.6 | 16.9 |

|                |     |            |             |      |      |
|----------------|-----|------------|-------------|------|------|
|                |     |            |             |      |      |
| *              | M+H | C40H71NO14 | 69.5        | 41.7 | 47.6 |
|                |     |            |             |      |      |
| irsen-28-oic a | M+H | C42H68O16  | 63.16666667 | 37.9 | 14.2 |
|                |     |            |             |      |      |
| ,7aR,8R,9Z,11  | M+H | C60H94O16  | 62.83333333 | 37.7 | 14.6 |

| Isotope Similarity | Isotopic Displacement | Link                                      | Description                 | Neutral mass (Da) | Charge | Retention time (min) |
|--------------------|-----------------------|-------------------------------------------|-----------------------------|-------------------|--------|----------------------|
| 98.0311493         | 100 - 8.37 - 0        | <a href="http://nonlin">http://nonlin</a> | Benzimidazole               |                   | 1      | 0.73403333           |
| 98.0311493         | 100 - 8.37 - 0        | <a href="http://nonlin">http://nonlin</a> | 5H-Cyclopentapyrazine       |                   | 1      | 0.73403333           |
|                    |                       |                                           |                             |                   |        |                      |
| 95.0686083         | 100 - 4.49 - 0        | <a href="http://nonlin">http://nonlin</a> | cyanuric acid               |                   | 1      | 0.73403333           |
|                    |                       |                                           |                             |                   |        |                      |
| 88.4189908         | 100 - 7.77 - 4        | <a href="http://nonlin">http://nonlin</a> | 2-Propanoylthiazole         |                   | 1      | 0.73403333           |
|                    |                       |                                           |                             |                   |        |                      |
| 96.4061201         | 100 - 4.16 - 0        | <a href="http://nonlin">http://nonlin</a> | Methylnitronitrosoguanidin  |                   | 1      | 4.13171667           |
|                    |                       |                                           |                             |                   |        |                      |
| 95.5626578         | 100 - 12.1 - 0        | <a href="http://nonlin">http://nonlin</a> | Amrinone                    |                   | 1      | 0.73403333           |
|                    |                       |                                           |                             |                   |        |                      |
| 86.9634587         | 100 - 13.9 - 1        | <a href="http://nonlin">http://nonlin</a> | N-Hydroxy-melQX             |                   | 1      | 4.166                |
|                    |                       |                                           |                             |                   |        |                      |
| 95.4819316         | 100 - 15.1 - 1        | <a href="http://nonlin">http://nonlin</a> | L-cis-Cyclo(aspartylphenyl) |                   | 1      | 4.166                |
|                    |                       |                                           |                             |                   |        |                      |
| 86.7756443         | 100 - 13.9 - 1        | <a href="http://nonlin">http://nonlin</a> | (4Z)-4-(2-Amino-5-oxo-1,5-  |                   | 1      | 4.166                |
|                    |                       |                                           |                             |                   |        |                      |
| 94.9594626         | 100 - 16.6 - 1        | <a href="http://nonlin">http://nonlin</a> | Piperdial                   |                   | 1      | 4.166                |
| 94.9594626         | 100 - 16.6 - 1        | <a href="http://nonlin">http://nonlin</a> | Blennin A                   |                   | 1      | 4.166                |
| 94.9594626         | 100 - 16.6 - 1        | <a href="http://nonlin">http://nonlin</a> | Lactaronecatorin A          |                   | 1      | 4.166                |
| 94.9594626         | 100 - 16.6 - 1        | <a href="http://nonlin">http://nonlin</a> | Warburganal                 |                   | 1      | 4.166                |
| 94.9594626         | 100 - 16.6 - 1        | <a href="http://nonlin">http://nonlin</a> | Heliannuol A                |                   | 1      | 4.166                |
| 94.9594626         | 100 - 16.6 - 1        | <a href="http://nonlin">http://nonlin</a> | Heliannuol D                |                   | 1      | 4.166                |
| 94.9594626         | 100 - 16.6 - 1        | <a href="http://nonlin">http://nonlin</a> | (1R,3aR,5aS,6R)-6-Hydroxy   |                   | 1      | 4.166                |
| 94.9594626         | 100 - 16.6 - 1        | <a href="http://nonlin">http://nonlin</a> | (1S,2R,3aR,5aS)-2-Hydroxy   |                   | 1      | 4.166                |
| 94.9594626         | 100 - 16.6 - 1        | <a href="http://nonlin">http://nonlin</a> | 1-Hydroxyacorenone          |                   | 1      | 4.166                |
| 94.9594626         | 100 - 16.6 - 1        | <a href="http://nonlin">http://nonlin</a> | (6beta,8alpha)-6-Hydroxy-   |                   | 1      | 0.73403333           |
|                    |                       |                                           |                             |                   |        |                      |
| 97.2776318         | 100 - 15.9 - 2        | <a href="http://nonlin">http://nonlin</a> | Niazirin                    |                   | 1      | 0.73403333           |
|                    |                       |                                           |                             |                   |        |                      |
| 93.9140816         | 100 - 16.2 - 2        | <a href="http://nonlin">http://nonlin</a> | Oxagrelate                  | 463.298759        | 1      | 4.27743333           |
|                    |                       |                                           |                             |                   |        |                      |
| 89.8131977         | 100 - 16.7 - 2        | <a href="http://nonlin">http://nonlin</a> | Octyl gallate               | 463.298759        | 1      | 4.27743333           |
| 83.8716609         | 100 - 16.7 - 2        | <a href="http://nonlin">http://nonlin</a> | Oxyhumulinic acid           |                   | 1      | 0.88831667           |
|                    |                       |                                           |                             |                   |        |                      |
| 96.3145769         | 100 - 16.6 - 2        | <a href="http://nonlin">http://nonlin</a> | (+)-leucopelargonidin       |                   | 1      | 0.7426               |
| 96.3145769         | 100 - 16.6 - 2        | <a href="http://nonlin">http://nonlin</a> | cis-3 and trans-2-Hexenyl p |                   | 1      | 4.14885              |
|                    |                       |                                           |                             |                   |        |                      |
| 94.7863584         | 100 - 20.6 - 2        | <a href="http://nonlin">http://nonlin</a> | amquinatate                 |                   | 1      | 0.67403333           |
| 94.7863584         | 100 - 20.6 - 2        | <a href="http://nonlin">http://nonlin</a> | 5-{3-[(2S)-Bicyclo[2.2.1]he |                   | 1      | 0.71688333           |
|                    |                       |                                           |                             |                   |        |                      |
| 90.952671          | 100 - 19.8 - 2        | <a href="http://nonlin">http://nonlin</a> | (+)-Ligballinol             |                   | 1      | 0.69975              |
| 89.0415486         | 100 - 22 - 3.1        | <a href="http://nonlin">http://nonlin</a> | 2,3-Dihydro-2,3-dihydroxy   |                   | 1      | 8.99353333           |
| 90.952671          | 100 - 19.8 - 2        | <a href="http://nonlin">http://nonlin</a> | 7C-aglycone                 |                   | 1      | 4.166                |
|                    |                       |                                           |                             |                   |        |                      |

|            |                |               |                           |   |            |
|------------|----------------|---------------|---------------------------|---|------------|
| 97.2802588 | 100 - 22.1 - 2 | http://nonlin | Arachidonic acid          | 1 | 0.73403333 |
|            |                |               |                           |   |            |
| 96.3692067 | 100 - 25.3 - 3 | http://nonlin | dimethisterone            | 1 | 4.166      |
| 96.3692067 | 100 - 25.3 - 3 | http://nonlin | 17-ethynylandrost-2-ene-1 | 1 | 0.73403333 |
|            |                |               |                           |   |            |
| 92.9086549 | 100 - 18.8 - 2 | http://nonlin | Mycophenolic acid         | 1 | 4.14028333 |
| 92.9086549 | 100 - 18.8 - 2 | http://nonlin | Oleacein                  | 1 | 4.24313333 |
|            |                |               |                           |   |            |
| 96.1314827 | 100 - 20.7 - 7 | http://nonlin | Piperonyl sulfoxide       | 1 | 4.24313333 |
|            |                |               |                           |   |            |
| 96.9667703 | 100 - 25.6 - 3 | http://nonlin | (R)-Mahanine              | 1 | 0.69975    |
| 96.9667703 | 100 - 25.6 - 3 | http://nonlin | Murrayazolinol            | 1 | 0.77688333 |
| 96.9667703 | 100 - 25.6 - 3 | http://nonlin | Pyrafoline D              | 1 | 0.77688333 |
|            |                |               |                           |   |            |
| 80.1379613 | 100 - 21.1 - 3 | http://nonlin | Tagitinin F               | 1 | 4.23456667 |
|            |                |               |                           |   |            |
| 95.0276132 | 100 - 26.4 - 3 | http://nonlin | Bufa-20,22-dienolide      | 1 | 0.73403333 |
|            |                |               |                           |   |            |
| 93.625403  | 100 - 22.1 - 3 | http://nonlin | 1,8-Dihydroxy-3,5-dimetho | 1 | 0.73403333 |
| 93.625403  | 100 - 22.1 - 3 | http://nonlin | Xanthoxylol               | 1 | 0.69116667 |
| 93.625403  | 100 - 22.1 - 3 | http://nonlin | Cubebin                   | 1 | 0.71688333 |
| 93.625403  | 100 - 22.1 - 3 | http://nonlin | 5-Deoxykievitol           | 1 | 0.72545    |
| 93.625403  | 100 - 22.1 - 3 | http://nonlin | Licoagrodione             | 1 | 0.67403333 |
| 93.625403  | 100 - 22.1 - 3 | http://nonlin | Licofuranone              | 1 | 0.73403333 |
| 93.625403  | 100 - 22.1 - 3 | http://nonlin | Kievitone                 | 1 | 4.23456667 |
| 93.625403  | 100 - 22.1 - 3 | http://nonlin | Kinobeaon A               | 1 | 4.23456667 |
| 96.1566677 | 100 - 17.9 - 1 | http://nonlin | Lipoyllysine              | 1 | 4.23456667 |
| 93.4384955 | 100 - 19.1 - 2 | http://nonlin | amifloxacin               | 1 | 0.73403333 |
|            |                |               |                           |   |            |
| 89.5030534 | 100 - 23.2 - 3 | http://nonlin | 17,21-Epoxy-9-fluoro-11be | 1 | 4.20885    |
|            |                |               |                           |   |            |
| 94.080151  | 100 - 22.1 - 3 | http://nonlin | Hydroxygaleon             | 1 | 4.13171667 |
|            |                |               |                           |   |            |
| 96.6508519 | 100 - 21.9 - 7 | http://nonlin | Androsterone sulfate      | 1 | 0.73403333 |
| 96.6508519 | 100 - 21.9 - 7 | http://nonlin | Etiocholanolone sulfate   | 1 | 4.20885    |
|            |                |               |                           |   |            |
| 92.9518421 | 100 - 19 - 3.3 | http://nonlin | xi-3-Hydroxy-5-phenylpent | 1 | 4.20885    |
|            |                |               |                           |   |            |
| 90.349871  | 100 - 24.3 - 3 | http://nonlin | 21-fluoro-11?,17-dihydrox | 1 | 4.20885    |
|            |                |               |                           |   |            |
| 95.9553369 | 100 - 27.6 - 4 | http://nonlin | Persicaxanthin            | 1 | 4.20885    |
| 95.9553369 | 100 - 27.6 - 4 | http://nonlin | Persicachrome             | 1 | 0.73403333 |
|            |                |               |                           |   |            |
| 92.8665893 | 100 - 26.4 - 3 | http://nonlin | dalvastatin               | 1 | 4.20885    |
| 95.990098  | 100 - 22.3 - 3 | http://nonlin | oleandolide               | 1 | 0.73403333 |
|            |                |               |                           |   |            |

|            |                |               |                             |            |   |            |
|------------|----------------|---------------|-----------------------------|------------|---|------------|
| 84.6257574 | 100 - 27.7 - 3 | http://nonlin | Liafensine                  |            | 1 | 0.73403333 |
|            |                |               |                             |            |   |            |
| 96.4052544 | 100 - 23.7 - 3 | http://nonlin | Dimorpholamine              |            | 1 | 0.73403333 |
|            |                |               |                             |            |   |            |
| 89.8179674 | 100 - 24.5 - 4 | http://nonlin | (14R)-3beta,5,6beta,10,16   |            | 1 | 0.67403333 |
|            |                |               |                             |            |   |            |
| 96.9814156 | 100 - 27.2 - 4 | http://nonlin | Benazepril                  |            | 1 | 4.20885    |
|            |                |               |                             |            |   |            |
| 85.9031001 | 100 - 24.4 - 3 | http://nonlin | Neurotensin 11-13           |            | 1 | 0.73403333 |
|            |                |               |                             |            |   |            |
| 92.0574054 | 100 - 26.8 - 8 | http://nonlin | Flupenthixol                |            | 1 | 4.20885    |
| 94.9854272 | 100 - 29.3 - 4 | http://nonlin | naltrindole                 |            | 1 | 0.73403333 |
|            |                |               |                             |            |   |            |
| 91.8102661 | 100 - 22.3 - 4 | http://nonlin | Ethyl 7-epi-12-hydroxyjasn  |            | 1 | 0.73403333 |
| 89.2721821 | 100 - 26.4 - 3 | http://nonlin | Radezolid                   |            | 1 | 0.73403333 |
|            |                |               |                             |            |   |            |
| 94.9882038 | 100 - 33 - 5.6 | http://nonlin | Ganoderal A                 | 506.282544 | 1 | 0.71688333 |
| 94.9882038 | 100 - 33 - 5.6 | http://nonlin | Manglupenone                |            | 1 | 4.20028333 |
|            |                |               |                             |            |   |            |
| 87.8211124 | 100 - 28.8 - 5 | http://nonlin | kurarinol                   |            | 1 | 4.24313333 |
| 82.7208612 | 100 - 28.7 - 3 | http://nonlin | Clobetasone butyrate        |            | 1 | 4.24313333 |
|            |                |               |                             |            |   |            |
| 87.9123586 | 100 - 28.9 - 9 | http://nonlin | N-Acetyl-leuk               | 370.181326 | 1 | 4.14885    |
|            |                |               |                             |            |   |            |
| 89.2081678 | 100 - 36.3 - 7 | http://nonlin | 7',8'-Dihydro-8'-hydroxycit |            | 1 | 4.14885    |
|            |                |               |                             |            |   |            |
| 89.5925864 | 100 - 29 - 5.8 | http://nonlin | Mupirocin                   |            | 1 | 4.406      |
| 90.7330712 | 100 - 36.3 - 6 | http://nonlin | Deterrol stearate           |            | 1 | 4.406      |
| 89.8592659 | 100 - 31.7 - 5 | http://nonlin | Carpaine                    |            | 1 | 4.20885    |
|            |                |               |                             |            |   |            |
| 90.4447706 | 100 - 23.2 - 4 | http://nonlin | ANTIBIOTIC JI-20A           |            | 1 | 4.20885    |
|            |                |               |                             |            |   |            |
| 93.9299414 | 100 - 31.4 - 1 | http://nonlin | Ixabepilone                 |            | 1 | 4.166      |
| 89.6012923 | 100 - 37.4 - 7 | http://nonlin | Tangeraxanthin              |            | 1 | 4.20885    |
|            |                |               |                             |            |   |            |
| 78.7843555 | 100 - 31.5 - 6 | http://nonlin | narbomycin                  |            | 1 | 8.37325    |
|            |                |               |                             |            |   |            |
| 97.3873371 | 100 - 30.1 - 6 | http://nonlin | (S)-Nerolidol 3-O-[a-L-rhan |            | 1 | 0.73403333 |
|            |                |               |                             |            |   |            |
| 82.0020277 | 100 - 25.4 - 5 | http://nonlin | Apramycin                   |            | 1 | 0.73403333 |
|            |                |               |                             |            |   |            |
| 88.2589798 | 100 - 38.6 - 7 | http://nonlin | Panaxydol linoleate         |            | 1 | 0.73403333 |
|            |                |               |                             |            |   |            |
| 90.2612223 | 100 - 35.8 - 1 | http://nonlin | (1S,2R,3S,4S,6R,7R,8R,14S)  |            | 1 | 4.23456667 |
|            |                |               |                             |            |   |            |
| 88.9797408 | 100 - 29.1 - 6 | http://nonlin | Canavalioid                 |            | 1 | 0.73403333 |

|            |                |               |                             |  |   |            |
|------------|----------------|---------------|-----------------------------|--|---|------------|
| 92.4274284 | 100 - 36.4 - 7 | http://nonlin | Morellinol                  |  | 1 | 0.73403333 |
|            |                |               |                             |  |   |            |
| 92.5375397 | 100 - 43.9 - 9 | http://nonlin | Echinenone                  |  | 1 | 0.73403333 |
| 92.5375397 | 100 - 43.9 - 9 | http://nonlin | 3-cis-Hydroxy-b,e-Caroten   |  | 1 | 0.73403333 |
|            |                |               |                             |  |   |            |
| 89.4877351 | 100 - 33.6 - 6 | http://nonlin | Omadacycline                |  | 1 | 0.73403333 |
|            |                |               |                             |  |   |            |
| 89.9941971 | 100 - 36.6 - 8 | http://nonlin | Timosaponin A-I             |  | 1 | 4.20885    |
| 89.9941971 | 100 - 36.6 - 8 | http://nonlin | (25S)-5beta-spirostan-3be   |  | 1 | 0.73403333 |
|            |                |               |                             |  |   |            |
| 93.4814245 | 100 - 36.6 - 7 | http://nonlin | Cholesterol glucuronide     |  | 1 | 0.72545    |
|            |                |               |                             |  |   |            |
| 93.9585324 | 100 - 35.4 - 7 | http://nonlin | Tanespimycin                |  | 1 | 4.20885    |
|            |                |               |                             |  |   |            |
| 90.4514488 | 100 - 43 - 9.8 | http://nonlin | Caffeoylcycloartenol        |  | 1 | 0.73403333 |
|            |                |               |                             |  |   |            |
| 88.6607506 | 100 - 44 - 9.8 | http://nonlin | Lutein                      |  | 1 | 0.73403333 |
|            |                |               |                             |  |   |            |
| 82.8681954 | 100 - 36.6 - 8 | http://nonlin | Agavoside A                 |  | 1 | 0.73403333 |
| 91.2166982 | 100 - 37.7 - 8 | http://nonlin | Tuberoside                  |  | 1 | 4.20885    |
|            |                |               |                             |  |   |            |
| 91.3090636 | 100 - 45.1 - 1 | http://nonlin | Hydroxyspirilloxanthin      |  | 1 | 0.6826     |
| 91.3090636 | 100 - 45.1 - 1 | http://nonlin | Spheroidenone               |  | 1 | 4.20885    |
| 91.3090636 | 100 - 45.1 - 1 | http://nonlin | Thiothece-474               |  | 1 | 4.20885    |
| 92.6386759 | 100 - 33.5 - 7 | http://nonlin | Polidocanol                 |  | 1 | 4.23456667 |
| 94.8403235 | 100 - 35.7 - 8 | http://nonlin | 3,6-Anhydro-2,4,5-tris-O-(2 |  | 1 | 4.20885    |
|            |                |               |                             |  |   |            |
| 87.3419065 | 100 - 36.5 - 7 | http://nonlin | BQ-123                      |  | 1 | 4.20885    |
|            |                |               |                             |  |   |            |
| 75.8332918 | 100 - 35.6 - 8 | http://nonlin | 13-deoxytedanolide          |  | 1 | 4.20885    |
|            |                |               |                             |  |   |            |
| 89.5406698 | 100 - 45.1 - 1 | http://nonlin | (8'R)-Neochrome             |  | 1 | 0.73403333 |
|            |                |               |                             |  |   |            |
| 94.624434  | 100 - 42.6 - 1 | http://nonlin | Neferine                    |  | 1 | 4.20885    |
|            |                |               |                             |  |   |            |
| 89.6581447 | 100 - 39.9 - 9 | http://nonlin | Momordicoside L             |  | 1 | 4.166      |
| 87.9131254 | 100 - 43.8 - 1 | http://nonlin | Eldacimibe                  |  | 1 | 4.20885    |
|            |                |               |                             |  |   |            |
| 88.2047879 | 100 - 41.1 - 1 | http://nonlin | Ginsenoside Rh5             |  | 1 | 4.20885    |
|            |                |               |                             |  |   |            |
| 80.3186079 | 100 - 46.8 - 1 | http://nonlin | Spirolide B                 |  | 1 | 4.23456667 |
|            |                |               |                             |  |   |            |
|            |                |               |                             |  |   |            |
| 80.8446752 | 100 - 43.3 - 1 | http://nonlin | trodusquemine               |  | 1 | 4.20885    |
|            |                |               |                             |  |   |            |
| 82.578559  | 100 - 42.3 - 1 | http://nonlin | MGDG(26:1/3:0)              |  | 1 | 0.6826     |

|            |                |               |                            |   |            |
|------------|----------------|---------------|----------------------------|---|------------|
| 82.578559  | 100 - 42.3 - 1 | http://nonlin | MGDG(3:0/26:1)             | 1 | 4.20885    |
|            |                |               |                            |   |            |
| 88.616159  | 100 - 41.2 - 1 | http://nonlin | Cyclopasifloside I         | 1 | 4.20885    |
| 88.616159  | 100 - 41.2 - 1 | http://nonlin | Cyclopasifloside IV        | 1 | 4.20885    |
| 88.616159  | 100 - 41.2 - 1 | http://nonlin | Cyclopasifloside X         | 1 | 4.20885    |
|            |                |               |                            |   |            |
| 88.8013985 | 100 - 43.4 - 1 | http://nonlin | MGDG(26:1/4:0)             | 1 | 4.20885    |
| 88.8013985 | 100 - 43.4 - 1 | http://nonlin | MGDG(4:0/2 588.418433      | 1 | 0.73403333 |
|            |                |               |                            |   |            |
| 96.1670933 | 100 - 45.3 - 1 | http://nonlin | Myxochromide S2            | 1 | 4.20885    |
|            |                |               |                            |   |            |
| 90.2935478 | 100 - 46.4 - 1 | http://nonlin | Myxochromide S3            | 1 | 4.20885    |
| 89.1224781 | 100 - 54 - 15  | http://nonlin | Ubiquinone-10              | 1 | 4.20885    |
|            |                |               |                            |   |            |
| 92.3867847 | 100 - 45.6 - 1 | http://nonlin | Digitoxin                  | 1 | 4.20885    |
| 92.3069691 | 100 - 43.4 - 1 | http://nonlin | Alliosterol 1-rhamnoside 1 | 1 | 4.23456667 |
|            |                |               |                            |   |            |
| 98.5031445 | 100 - 44.5 - 1 | http://nonlin | 1-PALMITOYL-2-OLEOYL-SM    | 1 | 4.20885    |
|            |                |               |                            |   |            |
| 96.3303537 | 100 - 47.8 - 1 | http://nonlin | Calendulose G methyl es    | 1 | 4.20885    |
| 97.0932657 | 100 - 45.7 - 1 | http://nonlin | Vinaginsenoside R11        | 1 | 4.20885    |
| 97.0932657 | 100 - 45.7 - 1 | http://nonlin | Majonoside R2              | 1 | 4.20885    |
|            |                |               |                            |   |            |
| 87.9193485 | 100 - 51.2 - 1 | http://nonlin | Koryoginsenoside R1        | 1 | 4.20885    |
|            |                |               |                            |   |            |
| 80.2049919 | 100 - 59.2 - 2 | http://nonlin | Everolimus                 | 1 | 4.20885    |
|            |                |               |                            |   |            |
| 79.7733331 | 100 - 11 - 5.2 | http://nonlin | Brassicinal A              | 1 | 5.08068333 |
|            |                |               |                            |   |            |
| 93.7449593 | 100 - 5.71 - 0 | http://nonlin | Guanidinoethyl methyl ph   | 1 | 4.47456667 |
|            |                |               |                            |   |            |
|            |                |               |                            |   |            |
| 87.5254842 | 100 - 18.6 - 3 | http://nonlin | trans-3-Hydroxycotinine gl | 1 | 0.69116667 |
|            |                |               |                            |   |            |
| 90.2330145 | 100 - 19.4 - 3 | http://nonlin | Tetraxetan                 | 1 | 4.13171667 |
|            |                |               |                            |   |            |
| 90.9197416 | 100 - 24.2 - 4 | http://nonlin | Gentamycin 463.298759      | 1 | 4.27743333 |
|            |                |               |                            |   |            |
| 89.7373266 | 100 - 29.2 - 5 | http://nonlin | Glycocholic acid           | 1 | 0.73403333 |
| 89.7373266 | 100 - 29.2 - 5 | http://nonlin | 3a,7b,12a-Trihydroxyoxoch  | 1 | 0.73403333 |
| 89.7373266 | 100 - 29.2 - 5 | http://nonlin | Sodium glycocholate        | 1 | 0.73403333 |
|            |                |               |                            |   |            |
| 91.8473904 | 100 - 33.1 - 6 | http://nonlin | Pristimerin                | 1 | 4.14885    |
|            |                |               |                            |   |            |
| 92.3307341 | 100 - 32.4 - 5 | http://nonlin | Cervonyl carnitine         | 1 | 8.86495    |
|            |                |               |                            |   |            |
| 80.5079976 | 100 - 19.2 - 4 | http://nonlin | dTDP-3-amino-2,3,6-tridec  | 1 | 4.046      |

|            |                |                                           |                              |  |   |            |
|------------|----------------|-------------------------------------------|------------------------------|--|---|------------|
|            |                |                                           |                              |  |   |            |
| 62.1461369 | 100 - 45 - 12. | <a href="http://nonlin">http://nonlin</a> | ERYTHROMYCIN PROPION         |  | 1 | 4.67458333 |
|            |                |                                           |                              |  |   |            |
| 79.2566309 | 100 - 46.8 - 1 | <a href="http://nonlin">http://nonlin</a> | 1beta,2alpha,3beta,19alph    |  | 1 | 4.14885    |
|            |                |                                           |                              |  |   |            |
| 81.2062812 | 100 - 66.6 - 2 | <a href="http://nonlin">http://nonlin</a> | (3S)-3-[(2S,3R,5S)-5-[(2R)-3 |  | 1 | 4.14885    |



in)

[illegible]
